# Supplementary material
Source: publisher site journal article supplement (https://www.dovepress.com/article/319728)
Supplement: Supplementary file 1 [file get_supplementary_file.php]

Appendix A. **Resident Nurse-for-a-Day skills guideline**

| **Skills** | **Method** | **Skills** | **Method** |
| --- | --- | --- | --- |
| Medications Administration by Route |  | Care Coordination |  |
| PO |  | Admission Process |  |
| SQ |  | Discharge Process |  |
| IM |  | POCR/Frailty Rounds |  |
| IV Push |  | Rounding with Physicians |  |
| IV through Alaris Pump |  | Contacting Physicians |  |
| Primary |  | Coordinating Imaging  or Procedure |  |
| Secondary |  |
| PCA syringe change |  | Entering Transport Request |  |
| Blood product Administration |  | Patient Education |  |
| LDA Management |  | Update White Board |  |
| Central Line Care |  | Provide Updates |  |
| GI tube (NG, NJ, OG, G etc.) |  | Disease Processes |  |
| Foley Care |  | Medication |  |
| Drain Management (ex. JP) |  | Documentation |  |
| Tracheostomy Care |  | Head to Toe |  |
| Specimen Collection |  | I/O |  |
| MDRO |  | LDA |  |
| Blood Specimen |  | IV MAR |  |
| Urine Specimen |  | MAR |  |
| Stool Specimen |  | Daily Care |  |
| Other: |  | Notes |  |
| Vital Signs |  | Care Plans |  |
| Wound Care |  | Critical Test |  |
| Basic Patient Care and Comfort |  | Safety |  |
| Turning/Re-positioning |  | Fall Precaution |  |
| Assisting to the bathroom or with bedpan |  | Other Precautions (Ex. Bleeding, Seizure, Isolation) |  |
| Transfer from bed to chair |  | Room clear of hazards |  |
| Feeding |  | Building Rapport (Bedside Chat) |  |
| Ambulating patient |  | Others: |  |
| Perineal care/Bathing |  | Bedside Handoff |  |
| Pain Assessment |  |  |  |

Please complete as many skills below as possible; Use as an activity guideline (does not to be turned in)

**Method: P = Performed; O = Observed;**

**Appendix B. Nurse-for-a-Day Questionnaire for Residents**

| 1. I have an understanding of the multidisciplinary team’s role in patient care | **5**  **Strongly Agree** | **4**  **Agree** | **3**  **Neutral** | **2**  **Disagree** | **1**  **Strongly Disagree** |
| --- | --- | --- | --- | --- | --- |
| 1. I have an understanding of the nurse’s role in patient care | **5**  **Strongly Agree** | **4**  **Agree** | **3**  **Neutral** | **2**  **Disagree** | **1**  **Strongly Disagree** |
| 1. I have good communication with nurses* | **5**  **Strongly Agree** | **4**  **Agree** | **3**  **Neutral** | **2**  **Disagree** | **1**  **Strongly Disagree** |
| 1. I enjoy collaborating with nurses.* | **5**  **Strongly Agree** | **4**  **Agree** | **3**  **Neutral** | **2**  **Disagree** | **1**  **Strongly Disagree** |
| 1. I feel comfortable with my skills in compassionately speaking with patients and family | **5**  **Strongly Agree** | **4**  **Agree** | **3**  **Neutral** | **2**  **Disagree** | **1**  **Strongly Disagree** |
| 1. I feel comfortable with my skills in managing an IV Pump | **5**  **Strongly Agree** | **4**  **Agree** | **3**  **Neutral** | **2**  **Disagree** | **1**  **Strongly Disagree** |
| 1. I feel comfortable with my skills in drawing blood for lab work | **5**  **Strongly Agree** | **4**  **Agree** | **3**  **Neutral** | **2**  **Disagree** | **1**  **Strongly Disagree** |
| 1. I am knowledgeable about the process for medication administration | **5**  **Strongly Agree** | **4**  **Agree** | **3**  **Neutral** | **2**  **Disagree** | **1**  **Strongly Disagree** |
| 1. I am familiar with progression of care rounds | **5**  **Strongly Agree** | **4**  **Agree** | **3**  **Neutral** | **2**  **Disagree** | **1**  **Strongly Disagree** |
| 1. I feel that the Nurse-for-a-Day program should be a part of training for new residents | **5**  **Strongly Agree** | **4**  **Agree** | **3**  **Neutral** | **2**  **Disagree** | **1**  **Strongly Disagree** |

1. What did you like best in the Nurse for a Day program? What did you like least in the Nurse for a Day program?
2. In what ways (if any) do you think this program will impact your practice as a physician?
3. What did you learn about nurses through this program?
4. What obstacles exist preventing inter-professional collaboration between physicians and nurses?
5. How do you think the Nurse for a Day Program could be improved?
6. Please share any other comments/feedback:

*Question 3 and 4 adapted from: Vazirani S, Hays RD, Shapiro MF, Cowan M. Effect of a multidisciplinary intervention on communication and collaboration among physicians and nurses. *Am J Crit Care*. 2005;14(1):71-77.

Appendix C. **Nurse-for-a-Day Questionnaire for nurses**

1. How many years have you practiced as a nurse?
2. How many years have you practiced at Cedars-Sinai?

| 1. The Resident Nurse for a Day Program should be included in the curriculum of all intern orientations. | **5**  **Strongly Agree** | **4**  **Agree** | **3**  **Neutral** | **2**  **Disagree** | **1**  **Strongly Disagree** |
| --- | --- | --- | --- | --- | --- |
| 1. The Nurse for a Day activity will improve communication between nurses and physicians. | **5**  **Strongly Agree** | **4**  **Agree** | **3**  **Neutral** | **2**  **Disagree** | **1**  **Strongly Disagree** |
| 1. The Nurse for a Day activity will improve inter-professional collaboration between nurses and physicians. | **5**  **Strongly Agree** | **4**  **Agree** | **3**  **Neutral** | **2**  **Disagree** | **1**  **Strongly Disagree** |

1. In what ways (if any) do you think this program will impact the future practice of the intern(s)?
2. In what ways (if any) do you think this program will impact your practice as a nurse?
3. What did you learn about the intern(s) through precepting?
4. What obstacles exist in preventing clear communication between physicians and nurses?
5. What obstacles exist preventing inter-professional collaboration between physicians and nurses?
6. Please share an experience where lack of clear communication or inter-professional collaboration lead to potential or real patient harm, as well as what you believe could have prevented the situation:
7. How do you think the Nurse for a Day Program could be improved?
8. Please share any other comments/feedback:
